# Supplementary material for: Developmental Changes of Immunity and Different Responses to Weaning Stress of Chinese Indigenous Piglets and Duroc Piglets during Suckling and Weaning Periods
Source: MDPI journal article supplement (doi:10.3390/ijms232415781), 2022-12-12
Supplement: s1 [file s1]

**Supplementary Table S1.** Primers sequences used for the RT-PCR.

| Gene names                      | 5'-3' Primer sequence                                            | Product size (bp) |
|---------------------------------|------------------------------------------------------------------|-------------------|
| <i>CD14</i>                     | F: CGTTTGTGGAGCCTGGAAG<br>R: TGCGGATGCGTGAAGTTG                  | 125               |
| <i>IL-1<math>\beta</math></i>   | F: AAGAGGGACATGGAGAAGCGATTTG<br>R: TTGTTCTGCTTGAGAGGTGCTGATG     | 114               |
| <i>IL-2</i>                     | F: AAGCTCTGGAGGGAGTGCTA<br>R: CAACAGCAGTTACTGTCTCATCA            | 115               |
| <i>IL-6</i>                     | F: GCTGCTTCTGGTGATGGCTACTG<br>R: AGAGGTGAAGAGCATTTTGTCTGAGG      | 97                |
| <i>IL-10</i>                    | F: GTCCGACTCAACGAAGAAGG<br>R: GCCAGGAAGATCAGGCAATA               | 106               |
| <i>IL-17</i>                    | F: GCACACGGGCTGCATCAACG<br>R: TGCAACCAACAGTGACCCGCA              | 124               |
| <i>IRAK1</i>                    | F: CAAGGCAGGTCAGGTTTCGT<br>R: TTCGTGGGGCGTGTAGTGT                | 126               |
| <i>IFN-<math>\gamma</math></i>  | F: CCATTCAAAGGAGCATGGAT<br>R: GAGTTCACTGATGGCTTTGC               | 146               |
| <i>LBP</i>                      | F: GAACACAGCCGAATGGTCTAC<br>R: GGAAGGAGTTGGTGGTCAGT              | 126               |
| <i>MD2</i>                      | F: TGCAATTCTCTGATGCAAG<br>R: CCACCATATTCTCGGCAAT                 | 162               |
| <i>MyD88</i>                    | F: GATGGTAGCGGTTGTCTCTGAT<br>R: GATGCTGGGGAACCTTTCTTC            | 146               |
| <i>NF-<math>\kappa</math>B</i>  | F: AGTACCCTGAGGCTATAACTCGC<br>R: TCCGCAATGGAGGAGAAGTC            | 109               |
| <i>NOD1</i>                     | F: CTGTCGTCAACACCGATCCA<br>R: CCAGTTGGTGACGCAGCTT                | 134               |
| <i>NOD2</i>                     | F: GAGCGCATCCTCTTAACCTTTCG<br>R: ACGCTCGTGATCCGTGAAC             | 105               |
| <i>RIP2</i>                     | F: CAGTGTCCAGTAAATCGCAGTTG<br>R: CAGGCTTCCGTCATCTGGTT            | 159               |
| <i>TNF-<math>\alpha</math></i>  | F: ATTCAGGGATGTGTGGCCTG<br>R: CCAGATGTCCCAGGTTGCAT               | 141               |
| <i>TRAF6</i>                    | F: CAAGAGAATACCCAGTCGCACA<br>R: ATCCGAGACAAAGGGGAAGAA            | 114               |
| <i>TLR-2</i>                    | F: GCAATAATGACACCTTCGCTGAGATTC<br>R: AGATGGCTGATGTTCTGAATTGACCTC | 139               |
| <i>TLR-4</i>                    | F: AGGACGAAGACTGGGTGAGGAATG<br>R: CCTGGATGATGTTAGCAGCGATGG       | 126               |
| <i><math>\beta</math>-actin</i> | F: GATCTGGCACCACACCTTCTACAAC<br>R: TCATCTTCTCACGGTTGGCTTTGG      | 107               |

*IL*, interleukin; *TNF*, tumor necrosis factor; *IRAK1*, interleukin-1 receptor-associated kinase 1; *LBP*, lipopolysaccharide binding protein; *TRAF6*, tumor necrosis factor receptor-associated factor 6; *MD-2*, myeloid differential protein-2; *NOD*, nucleotide binding oligomerization domain; *CD14*, cluster of differentiation 14; *MyD88*, myeloid differentiation factor 88; *NF- $\kappa$ B*, nuclear factor kappa B; *RIP2*, receptor-interact protein 2.

**Supplementary Table S2.** Changes in blood cell-related hematological parameters in different pig breeds during suckling and weaning periods.

| Items                                                                         | TB                    | XB                   | DR                    | SEM  | <i>p</i> Values |
|-------------------------------------------------------------------------------|-----------------------|----------------------|-----------------------|------|-----------------|
| Red blood cell count (RBC, 10 <sup>12</sup> /L)                               |                       |                      |                       |      |                 |
| 1 day of age                                                                  | 5.44 <sup>C</sup>     | 5.51 <sup>C</sup>    | 5.64 <sup>C</sup>     | 0.14 | 0.834           |
| 10 days of age                                                                | 5.28 <sup>Cb</sup>    | 5.93 <sup>BCb</sup>  | 6.80 <sup>Ba</sup>    | 0.18 | 0.001           |
| 21 days of age                                                                | 6.50 <sup>Bb</sup>    | 6.52 <sup>Bb</sup>   | 7.83 <sup>Aa</sup>    | 0.16 | <0.001          |
| 24 days of age                                                                | 7.97 <sup>A</sup>     | 7.82 <sup>A</sup>    | 8.43 <sup>A</sup>     | 0.13 | 0.124           |
| SEM                                                                           | 0.20                  | 0.17                 | 0.21                  |      |                 |
| <i>p</i> values                                                               | <0.001                | <0.001               | <0.001                |      |                 |
| Hemoglobin (HGB, g/L)                                                         |                       |                      |                       |      |                 |
| 1 day of age                                                                  | 97.50 <sup>C</sup>    | 95.80 <sup>C</sup>   | 103.30 <sup>C</sup>   | 2.64 | 0.493           |
| 10 days of age                                                                | 99.60 <sup>Cc</sup>   | 112.10 <sup>Bb</sup> | 127.60 <sup>Ba</sup>  | 2.64 | <0.001          |
| 21 days of age                                                                | 126.40 <sup>Bab</sup> | 119.90 <sup>Bb</sup> | 134.60 <sup>ABa</sup> | 2.13 | 0.013           |
| 24 days of age                                                                | 141.60 <sup>A</sup>   | 139.20 <sup>A</sup>  | 142.60 <sup>A</sup>   | 1.84 | 0.755           |
| SEM                                                                           | 3.42                  | 2.88                 | 3.06                  |      |                 |
| <i>p</i> values                                                               | <0.001                | <0.001               | <0.001                |      |                 |
| Hematocrit (HCT, %)                                                           |                       |                      |                       |      |                 |
| 1 day of age                                                                  | 31.18 <sup>C</sup>    | 31.84 <sup>C</sup>   | 33.23 <sup>B</sup>    | 0.86 | 0.626           |
| 10 days of age                                                                | 33.39 <sup>Cc</sup>   | 38.52 <sup>Bb</sup>  | 41.41 <sup>Aa</sup>   | 0.81 | <0.001          |
| 21 days of age                                                                | 39.13 <sup>Bb</sup>   | 39.07 <sup>Bb</sup>  | 44.01 <sup>Aa</sup>   | 0.62 | <0.001          |
| 24 days of age                                                                | 44.77 <sup>A</sup>    | 45.30 <sup>A</sup>   | 43.72 <sup>A</sup>    | 0.58 | 0.539           |
| SEM                                                                           | 1.00                  | 0.88                 | 0.92                  |      |                 |
| <i>p</i> values                                                               | <0.001                | <0.001               | <0.001                |      |                 |
| Mean corpuscular volume (MCV, fL)                                             |                       |                      |                       |      |                 |
| 1 day of age                                                                  | 57.31 <sup>B</sup>    | 57.74 <sup>B</sup>   | 59.23 <sup>AB</sup>   | 0.81 | 0.613           |
| 10 days of age                                                                | 63.67 <sup>A</sup>    | 65.73 <sup>A</sup>   | 61.08 <sup>A</sup>    | 0.97 | 0.145           |
| 21 days of age                                                                | 60.67 <sup>ABa</sup>  | 60.08 <sup>Ba</sup>  | 56.37 <sup>Bb</sup>   | 0.79 | 0.048           |
| 24 days of age                                                                | 56.33 <sup>Ba</sup>   | 58.04 <sup>Ba</sup>  | 52.01 <sup>Cb</sup>   | 0.73 | 0.001           |
| SEM                                                                           | 0.83                  | 0.80                 | 0.83                  |      |                 |
| <i>p</i> values                                                               | 0.004                 | <0.001               | <0.001                |      |                 |
| Mean corpuscular hemoglobin (MCH, pg)                                         |                       |                      |                       |      |                 |
| 1 day of age                                                                  | 17.89 <sup>B</sup>    | 17.40 <sup>C</sup>   | 18.36 <sup>A</sup>    | 0.20 | 0.149           |
| 10 days of age                                                                | 19.03 <sup>AB</sup>   | 19.06 <sup>A</sup>   | 18.81 <sup>A</sup>    | 0.25 | 0.911           |
| 21 days of age                                                                | 19.56 <sup>Aa</sup>   | 18.41 <sup>ABb</sup> | 17.31 <sup>Bc</sup>   | 0.25 | <0.001          |
| 24 days of age                                                                | 17.83 <sup>Ba</sup>   | 17.86 <sup>BCa</sup> | 16.95 <sup>Bb</sup>   | 0.18 | 0.062           |
| SEM                                                                           | 0.23                  | 0.19                 | 0.20                  |      |                 |
| <i>p</i> values                                                               | 0.010                 | 0.007                | 0.001                 |      |                 |
| Mean corpuscular hemoglobin concentration (MCHC, g/L)                         |                       |                      |                       |      |                 |
| 1 day of age                                                                  | 312.60 <sup>Aa</sup>  | 301.40 <sup>Ab</sup> | 311.20 <sup>Ba</sup>  | 2.05 | 0.046           |
| 10 days of age                                                                | 299.20 <sup>Bab</sup> | 290.40 <sup>Bb</sup> | 307.90 <sup>Ba</sup>  | 2.49 | 0.011           |
| 21 days of age                                                                | 322.80 <sup>Aa</sup>  | 306.80 <sup>Ab</sup> | 307.33 <sup>Bb</sup>  | 2.58 | 0.011           |
| 24 days of age                                                                | 316.30 <sup>Ab</sup>  | 307.80 <sup>Ac</sup> | 326.30 <sup>Aa</sup>  | 2.00 | <0.001          |
| SEM                                                                           | 2.13                  | 1.88                 | 2.17                  |      |                 |
| <i>P</i> Values                                                               | <0.001                | 0.001                | 0.003                 |      |                 |
| Coefficient variation of red blood cell volume distribution width (RDW-CV, %) |                       |                      |                       |      |                 |
| 1 day of age                                                                  | 19.55 <sup>Cb</sup>   | 20.31 <sup>Cb</sup>  | 27.79 <sup>Aa</sup>   | 0.95 | <0.001          |
| 10 days of age                                                                | 27.65 <sup>A</sup>    | 26.83 <sup>A</sup>   | 25.81 <sup>AB</sup>   | 0.54 | 0.387           |

|                                                                |                      |                      |                      |       |        |
|----------------------------------------------------------------|----------------------|----------------------|----------------------|-------|--------|
| 21 days of age                                                 | 24.57 <sup>B</sup>   | 22.92 <sup>B</sup>   | 22.42 <sup>B</sup>   | 0.45  | 0.122  |
| 24 days of age                                                 | 21.76 <sup>C</sup>   | 22.35 <sup>B</sup>   | 22.70 <sup>B</sup>   | 0.37  | 0.601  |
| SEM                                                            | 0.61                 | 0.46                 | 0.69                 |       |        |
| <i>p</i> values                                                | <0.001               | <0.001               | 0.011                |       |        |
| Standard deviation in red cell distribution width (RDW-SD, fL) |                      |                      |                      |       |        |
| 1 day of age                                                   | 43.18 <sup>Cb</sup>  | 45.12 <sup>Cb</sup>  | 64.31 <sup>Aa</sup>  | 2.85  | 0.001  |
| 10 days of age                                                 | 67.38 <sup>A</sup>   | 66.37 <sup>A</sup>   | 60.81 <sup>A</sup>   | 1.90  | 0.329  |
| 21 days of age                                                 | 58.73 <sup>Ba</sup>  | 53.42 <sup>Bab</sup> | 49.27 <sup>Bb</sup>  | 1.55  | 0.038  |
| 24 days of age                                                 | 47.85 <sup>C</sup>   | 49.98 <sup>BC</sup>  | 45.80 <sup>B</sup>   | 0.89  | 0.160  |
| SEM                                                            | 1.98                 | 1.61                 | 2.23                 |       |        |
| <i>p</i> values                                                | <0.001               | <0.001               | 0.004                |       |        |
| Platelet (PLT, 10 <sup>9</sup> /L)                             |                      |                      |                      |       |        |
| 1 day of age                                                   | 376.30 <sup>B</sup>  | 381.70 <sup>C</sup>  | 418.00 <sup>B</sup>  | 17.33 | 0.581  |
| 10 days of age                                                 | 769.20 <sup>Aa</sup> | 860.20 <sup>Aa</sup> | 563.10 <sup>Ab</sup> | 40.90 | 0.006  |
| 21 days of age                                                 | 625.00 <sup>A</sup>  | 585.90 <sup>B</sup>  | 531.44 <sup>A</sup>  | 27.18 | 0.383  |
| 24 days of age                                                 | 610.50 <sup>A</sup>  | 690.80 <sup>B</sup>  | 562.00 <sup>A</sup>  | 31.44 | 0.247  |
| SEM                                                            | 36.85                | 35.25                | 21.14                |       |        |
| <i>p</i> values                                                | 0.001                | <0.001               | 0.041                |       |        |
| Mean platelet volume (MPV, fL)                                 |                      |                      |                      |       |        |
| 1 day of age                                                   | 10.57 <sup>A</sup>   | 10.15 <sup>A</sup>   | 10.65 <sup>A</sup>   | 0.13  | 0.222  |
| 10 days of age                                                 | 10.24 <sup>Aa</sup>  | 9.59 <sup>Bb</sup>   | 10.26 <sup>Aa</sup>  | 0.12  | 0.035  |
| 21 days of age                                                 | 9.24 <sup>Bb</sup>   | 9.70 <sup>ABab</sup> | 10.10 <sup>Aa</sup>  | 0.12  | 0.010  |
| 24 days of age                                                 | 9.46 <sup>B</sup>    | 8.95 <sup>C</sup>    | 9.33 <sup>B</sup>    | 0.12  | 0.179  |
| SEM                                                            | 0.13                 | 0.11                 | 0.13                 |       |        |
| <i>p</i> values                                                | <0.001               | <0.001               | 0.001                |       |        |
| Platelet distribution width (PDW)                              |                      |                      |                      |       |        |
| 1 day of age                                                   | 15.85 <sup>Ab</sup>  | 16.28 <sup>Aa</sup>  | 16.25 <sup>Aa</sup>  | 0.06  | 0.002  |
| 10 days of age                                                 | 15.87 <sup>Aa</sup>  | 15.89 <sup>Ba</sup>  | 15.47 <sup>Bb</sup>  | 0.05  | <0.001 |
| 21 days of age                                                 | 15.33 <sup>B</sup>   | 15.50 <sup>C</sup>   | 15.32 <sup>BC</sup>  | 0.05  | 0.241  |
| 24 days of age                                                 | 15.17 <sup>Bb</sup>  | 15.52 <sup>Ca</sup>  | 15.12 <sup>Cb</sup>  | 0.07  | 0.041  |
| SEM                                                            | 0.06                 | 0.06                 | 0.09                 |       |        |
| <i>p</i> values                                                | <0.001               | <0.001               | <0.001               |       |        |
| Plateletcrit (PCT, %)                                          |                      |                      |                      |       |        |
| 1 day of age                                                   | 0.40 <sup>B</sup>    | 0.39 <sup>C</sup>    | 0.44 <sup>B</sup>    | 0.02  | 0.410  |
| 10 days of age                                                 | 0.69 <sup>Aa</sup>   | 0.76 <sup>Aa</sup>   | 0.58 <sup>Ab</sup>   | 0.02  | 0.002  |
| 21 days of age                                                 | 0.57 <sup>A</sup>    | 0.57 <sup>B</sup>    | 0.54 <sup>AB</sup>   | 0.02  | 0.817  |
| 24 days of age                                                 | 0.58 <sup>A</sup>    | 0.62 <sup>B</sup>    | 0.52 <sup>AB</sup>   | 0.03  | 0.362  |
| SEM                                                            | 0.02                 | 0.03                 | 0.02                 |       |        |
| <i>p</i> values                                                | 0.001                | <0.001               | 0.074                |       |        |

Data are presented as means with their pooled SEM ( $n = 10$ ). Different uppercase letters in the same column indicate significant differences among different days of age ( $P < 0.05$ ), and different lowercase letters in the same row indicate significant differences among different pig breeds ( $P < 0.05$ ). DR, Duroc piglet; TB, Taoyuan Black piglet; XB, Xiangcun Black piglet.
